# Supplementary material
Source: PubMed Central journal article supplement (PMC5363307)
Supplement: mmc1.pdf [file mmc1.pdf]

YMTHE, Volume 25

## **Supplemental Information**

### **Improved Intravitreal AAV-Mediated Inner Retinal Gene Transduction after Surgical Internal Limiting Membrane Peeling in Cynomolgus Monkeys**

**Kazuhiisa Takahashi, Tsutomu Igarashi, Koichi Miyake, Maika Kobayashi, Chiemi Yaguchi, Osamu Iijima, Yoshiyuki Yamazaki, Yuko Katakai, Noriko Miyake, Shuhei Kameya, Takashi Shimada, Hiroshi Takahashi, and Takashi Okada**

## Supplementary Figure

**Figure S1.**

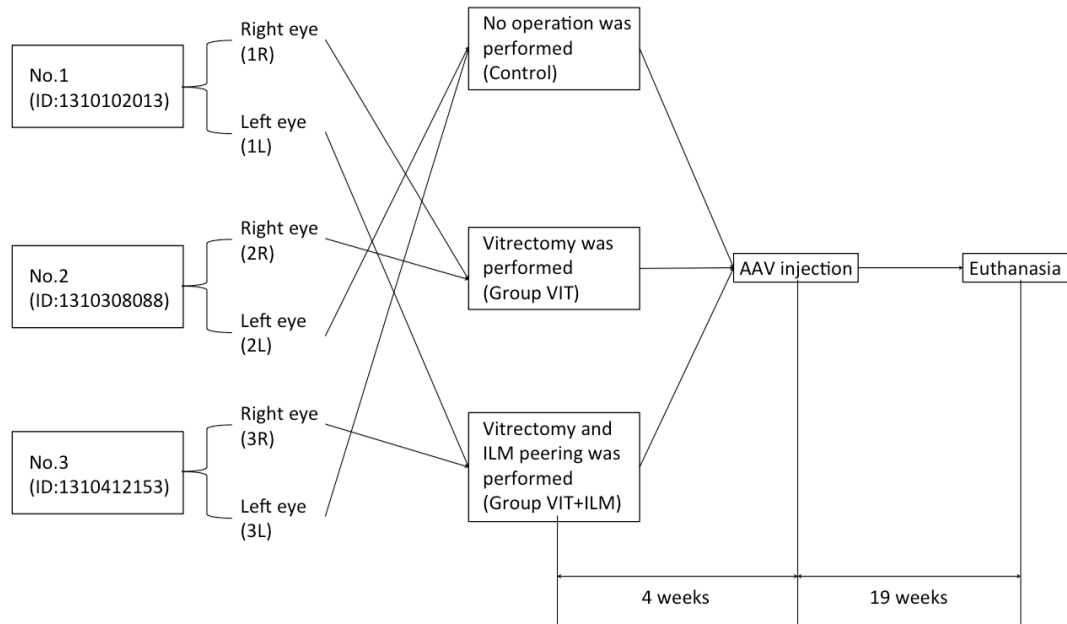

**Figure S1. Experiment design.**

We divided 6 eyes into three groups: 2 eyes received VIT 1 month before AAV injection (Group VIT), 2 eyes received VIT and ILM peeling 1 month before AAV injection (Group VIT+ILM), and 2 eyes received no pretreatment before AAV injection (Control). Nineteen weeks after intravitreal injection of AAV, eyes were enucleated, and histological analysis was performed.

**Figure S2.**

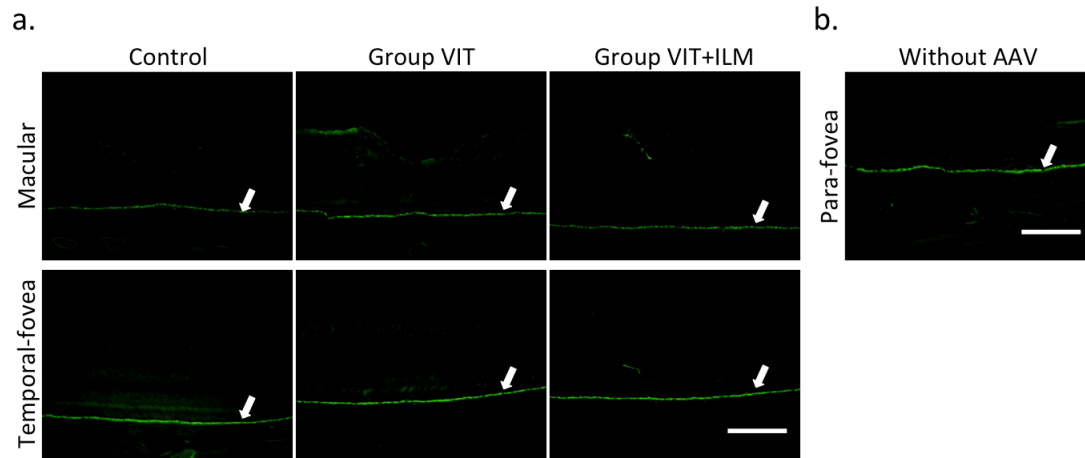

**Figure S2. Autofluorescence from the RPE.**

a) Nineteen weeks after intravitreal injection of AAV, eyes were enucleated, sectioned and stained for GFP without a secondary antibody to detect the autofluorescence (200 $\times$ , bar = 200  $\mu$ m). b) Histological evaluation of GFP expression in the retina without tm-scAAV2/EGFP administration, we sectioned para fovea and stained for GFP (200 $\times$ , bar = 200  $\mu$ m).

GFP expression in the RPE was detected without a secondary antibody and without tm-scAAV2/EGFP administrated retina, indicating that the RPE exhibits autofluorescence (White arrows).

**Figure S3.**

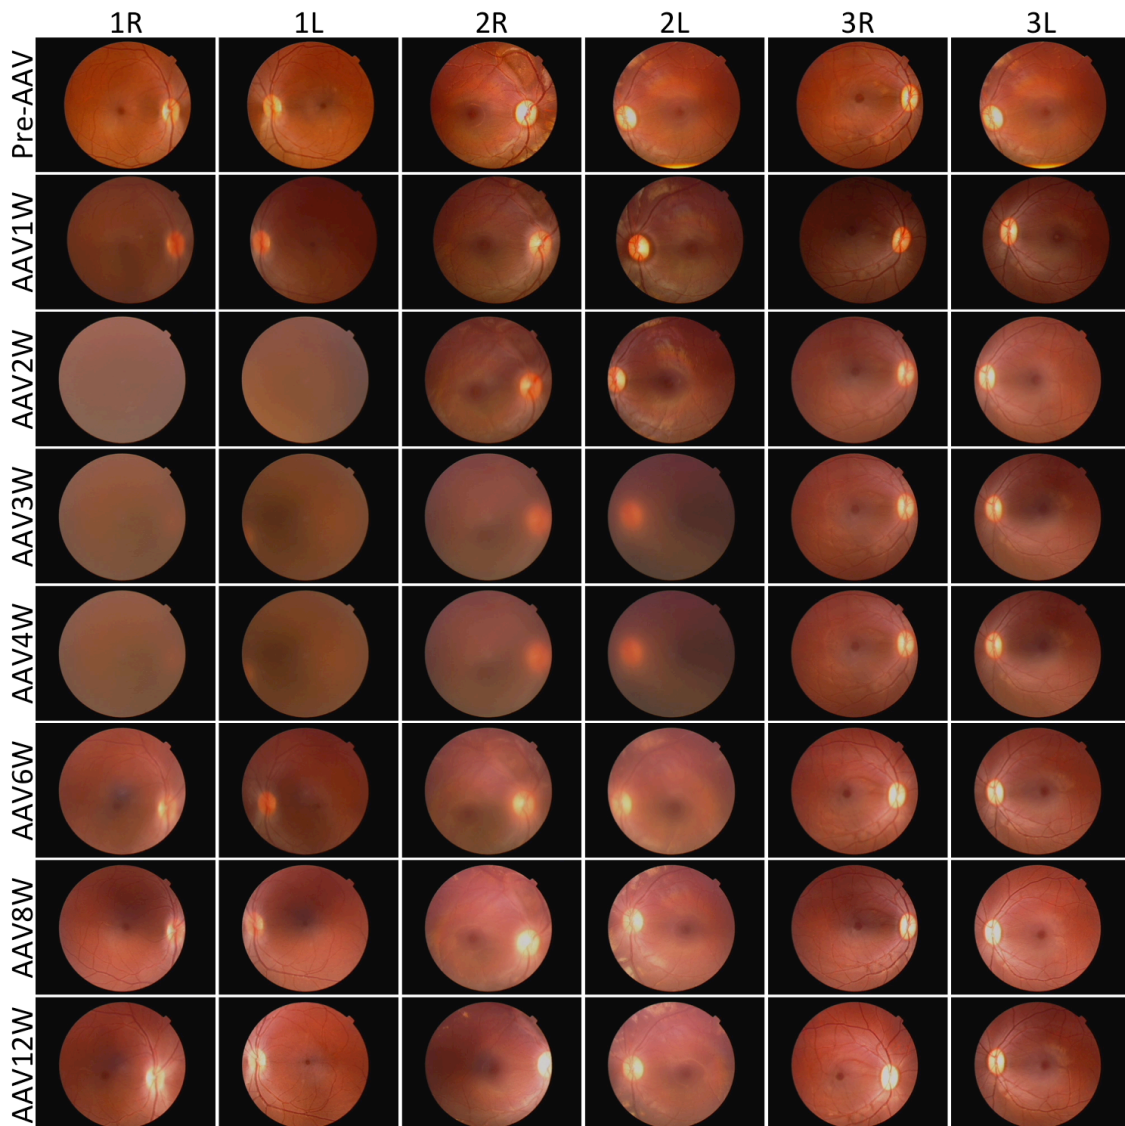

**Figure S3. Color fundus images before and after AAV injection.**

Vitreous inflammation was detected in both eyes of monkey No.1 during weeks 2-4 after AAV vector injection. Mild inflammation remained 6 weeks after AAV vector injection but was healed naturally by week 8 after injection. Vitreous inflammation was detected in both eyes of monkey No. 2 during weeks 3-4, after AAV injection, and mild inflammation

remained 6 weeks after AAV injection, but was healed naturally by 8 weeks after injection.

No inflammation was detected in either eye of monkey No. 3.

**Figure S4.**

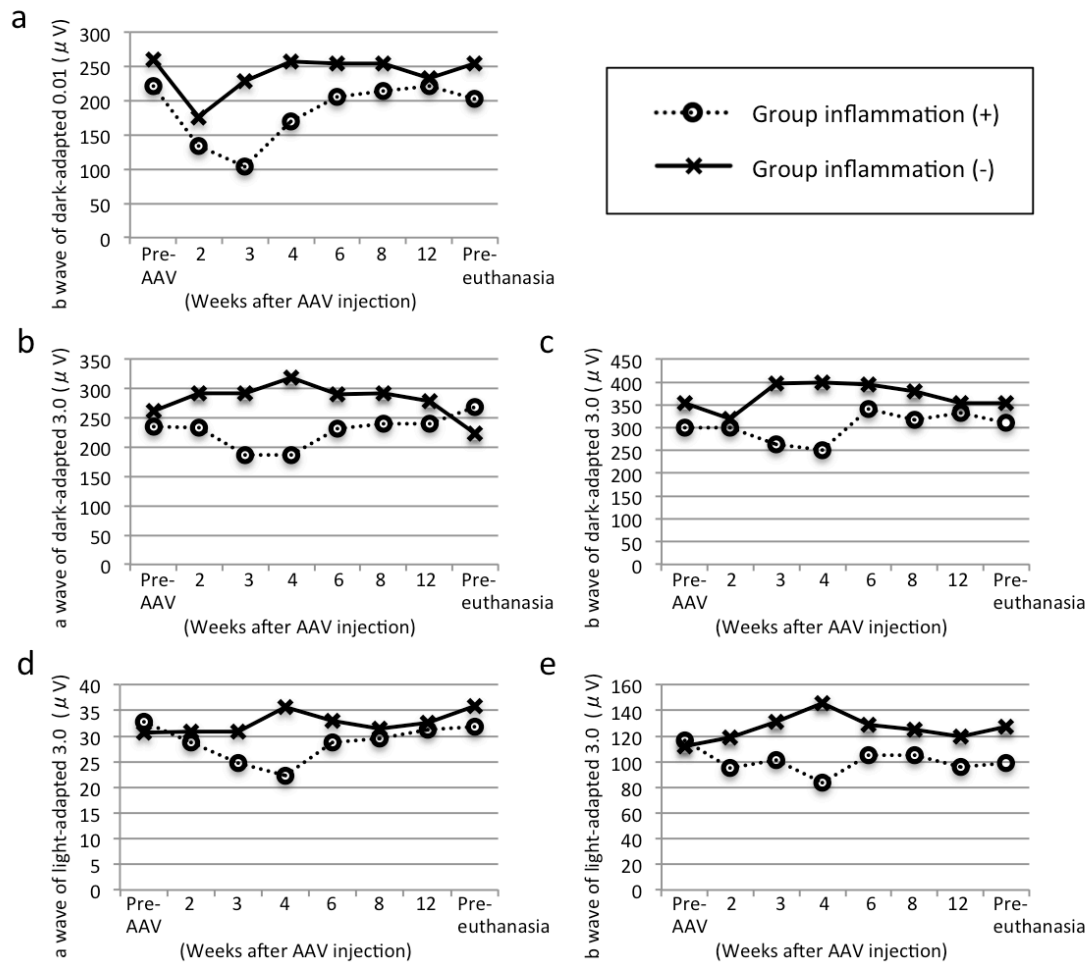

**Figure S4. Amplitudes of a- and b-waves in full-field ERGs.**

Amplitudes of full-field ERGs were regrouped to compare eyes with inflammation (group inflammation (+), n=4) to eyes without inflammation (group inflammation (-), n=2). (a) Plots of amplitudes of b-waves in dark-adapted 0.01 full-field ERGs. (b, c) Plots of amplitudes of a-waves (b) and b-waves (c) of dark-adapted 3.0 full-field ERGs. (d, e) Plots of amplitudes of a-waves (d) and b-waves (e) of light-adapted 3.0 full-field ERGs.
